# Supplementary material for: In Vivo Functional Assay in Fish Gills: Exploring Branchial Acid-Excreting Mechanisms in Zebrafish
Source: MDPI journal article supplement (doi:10.3390/ijms23084419), 2022-04-16
Supplement: s1 [file s1]

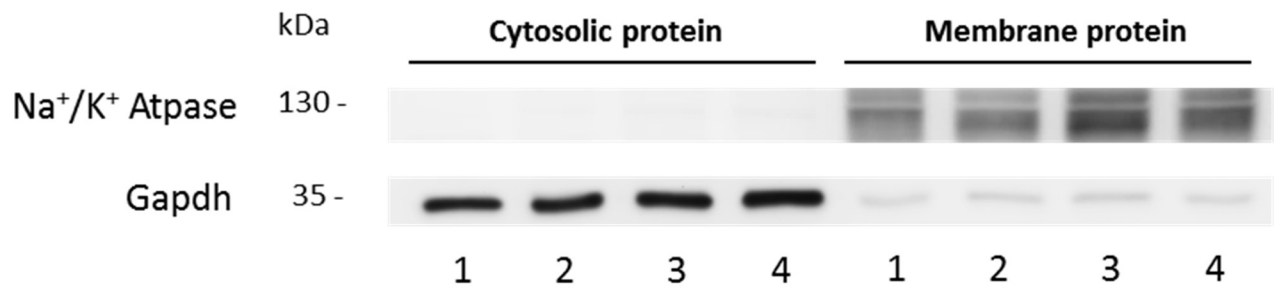

**Figure S2.** Isolation quality test of the cytosolic and membrane fractions. The cytosolic and membrane proteins were extracted from the gills of wild-type zebrafish. 15 µg cytosolic and membrane proteins were loaded for western blot (N=4). The blots showed the bands with molecular weights corresponding to Na<sup>+</sup>/K<sup>+</sup> ATPase and Gapdh (approximately 130 kDa and 35 kDa, respectively). The same number represents the proteins isolated from the same sample.
