# Supplementary material for: In Vivo Functional Assay in Fish Gills: Exploring Branchial Acid-Excreting Mechanisms in Zebrafish
Source: MDPI journal article supplement (doi:10.3390/ijms23084419), 2022-04-16
Supplement: s1 [file s1]

(a) *atp6v1aa*

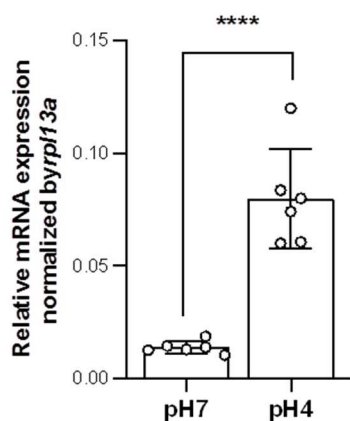

(b) *slc9a3.2*

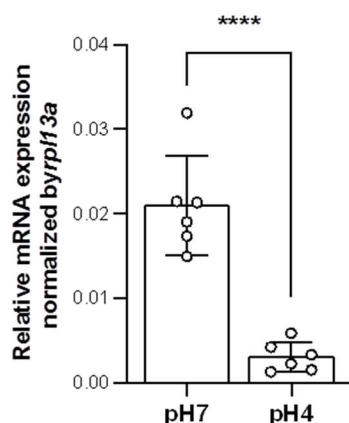

(c) *slc4a1b*

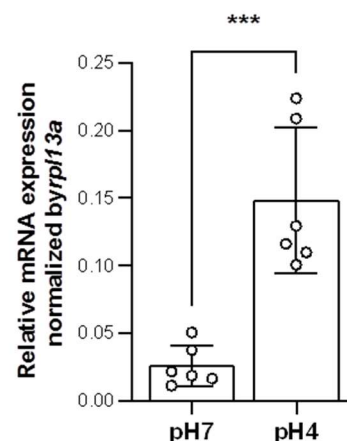

(d) *ca2*

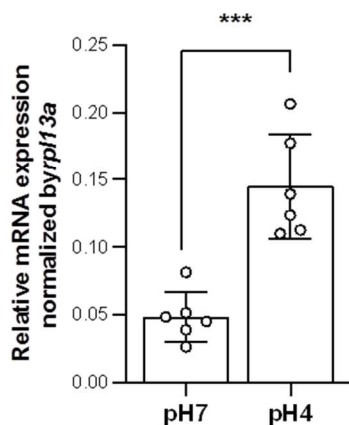

(e) *gcm2*

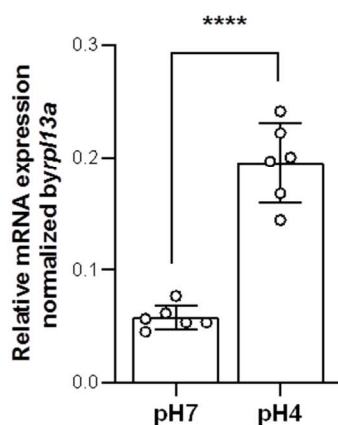

**Figure S1.** Effects of acid acclimation on the mRNA expression of acid excretion-related genes in the gills. The mRNA expression levels of *atp6v1aa* (HA) (a), *slc9a3.2* (Nhe3b) (b), *slc4a1b* (Ae1b) (c), *ca2* (d), and *gcm2* (e) in adult gills were analyzed by quantitative real-time polymerase chain reaction (qRT-PCR) after acid acclimation. Data were normalized to *rpl13a*. Values are the mean  $\pm$  SD (N=6). Student's *t*-test, \*\*\* $p < 0.001$ , \*\*\*\* $p < 0.0001$ .
