# Supplementary material for: In Vivo Functional Assay in Fish Gills: Exploring Branchial Acid-Excreting Mechanisms in Zebrafish
Source: MDPI journal article supplement (doi:10.3390/ijms23084419), 2022-04-16
Supplement: s1 [file s1]

**Table S1.** Primer sets used for qRT-PCR.

| Name                   | Ensembl ID          | Sequence (5' to 3') |                          |
|------------------------|---------------------|---------------------|--------------------------|
| <b><i>rpl13a</i></b>   | ENSDARG000000116541 | Forward             | CCTCGGTCGTCTTTCCGCTATTG  |
|                        |                     | Reverse             | CAGCCTGACCCCTCTTGGTTTTG  |
| <b><i>atp6v1aa</i></b> | ENSDARG000000113437 | Forward             | GAGGAACCACTGCCATTCCA     |
|                        |                     | Reverse             | CAACCCACATAAATGATGACATC  |
| <b><i>slc9a3.2</i></b> | ENSDARG000000036722 | Forward             | TGCAGACAGCGCCTCTAGC      |
|                        |                     | Reverse             | TGTGGCCTGTCTCTGTTTGC     |
| <b><i>slc4a1b</i></b>  | ENSDARG000000024560 | Forward             | GGGAATCACATCACTGAGTGGT   |
|                        |                     | Reverse             | GCATCTTACTGGTGCTGACTC    |
| <b><i>ca2</i></b>      | ENSDARG000000014488 | Forward             | TCGTCTGCAAACAGTCCATCA    |
|                        |                     | Reverse             | TCCGAGAGGCCCTTCATT       |
| <b><i>gcm2</i></b>     | ENSDARG000000045413 | Forward             | TCCCTGTGGTTATGACTTTGCA   |
|                        |                     | Reverse             | TGGACTIONGAGCCATGAGACACT |
